# Supplementary material for: Electrochemical screening of selected β-blockers at a polarized liquid–liquid interface
Source: Royal Society of Chemistry journal article supplement (doi:10.1039/d3an02051g), 2024-01-01
Supplement: d3an02051g1.pdf [file d3an02051g1.pdf]

*Electronic Supporting Information*

**Electrochemical screening of selected  $\beta$  - blockers at the polarized liquid – liquid interface**

Karolina Sobczak,<sup>a</sup> Konrad Rudnicki,<sup>a</sup> Lukasz Poltorak<sup>a\*</sup>

a. Department of Inorganic and Analytical Chemistry, Electroanalysis and Electrochemistry Group, Faculty of Chemistry, University of Lodz, Tamka 12, 91-403 Lodz, Poland

\*First corresponding author: lukasz.poltorak@chemia.uni.lodz.pl

\*\*Second corresponding author: konrad.rudnicki@chemia.uni.lodz.pl

**Table of contents:**

Page 2. Fig. S1 - Concentration fraction diagrams

Page 3. Fig. S2 - Cyclic voltammograms recorded at different pH – betaxolol

Page 4. Fig. S3 - Cyclic voltammograms recorded at different pH - carteolol

Page 5. Fig. S4 - Cyclic voltammograms recorded at different pH - labetalol

Page 6. Fig. S5 - Cyclic voltammograms recorded at different pH - pindolol

Page 7. Fig. S6 - Cyclic voltammograms recorded at different pH - nebivolol

Page 8. Fig. S7 - Scan rate dependency.

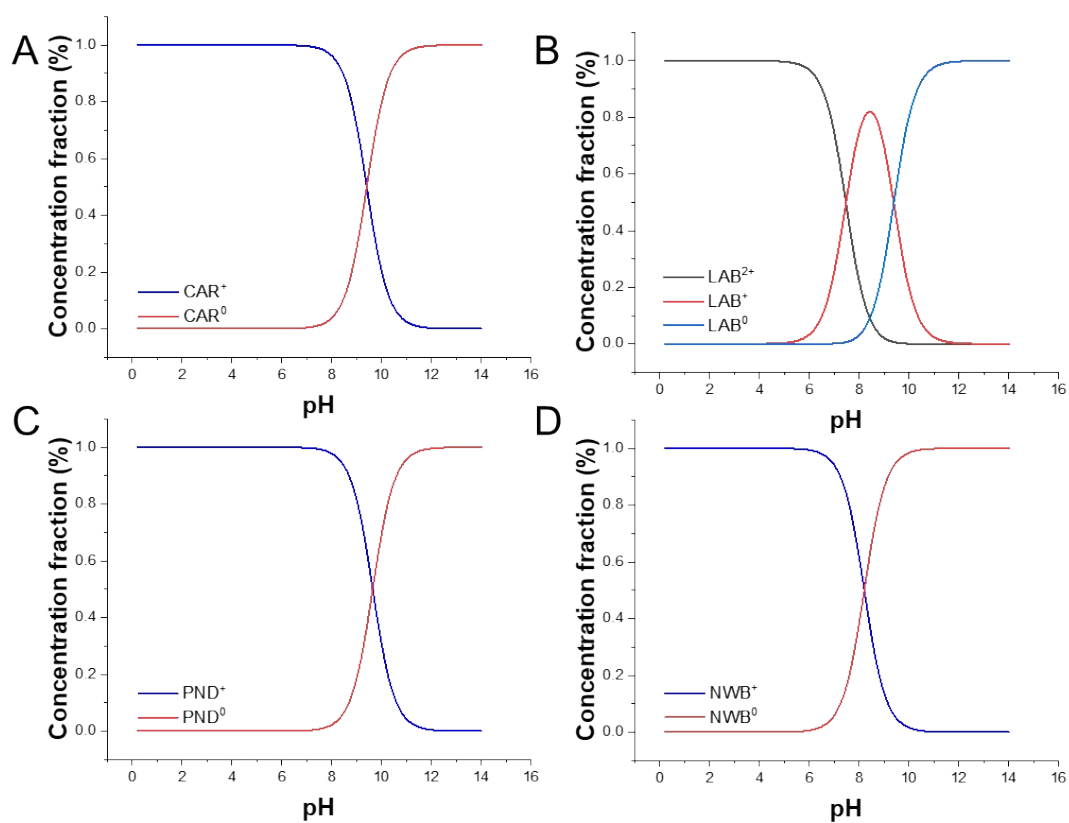

**Figure S1** Concentration fraction diagrams for selected  $\beta$ -blockers, A – CAR; B – LAB; C – PND; D – NVB. For the pKa values for each  $\beta$ -blockers see Table 1 from the main text of the manuscript.

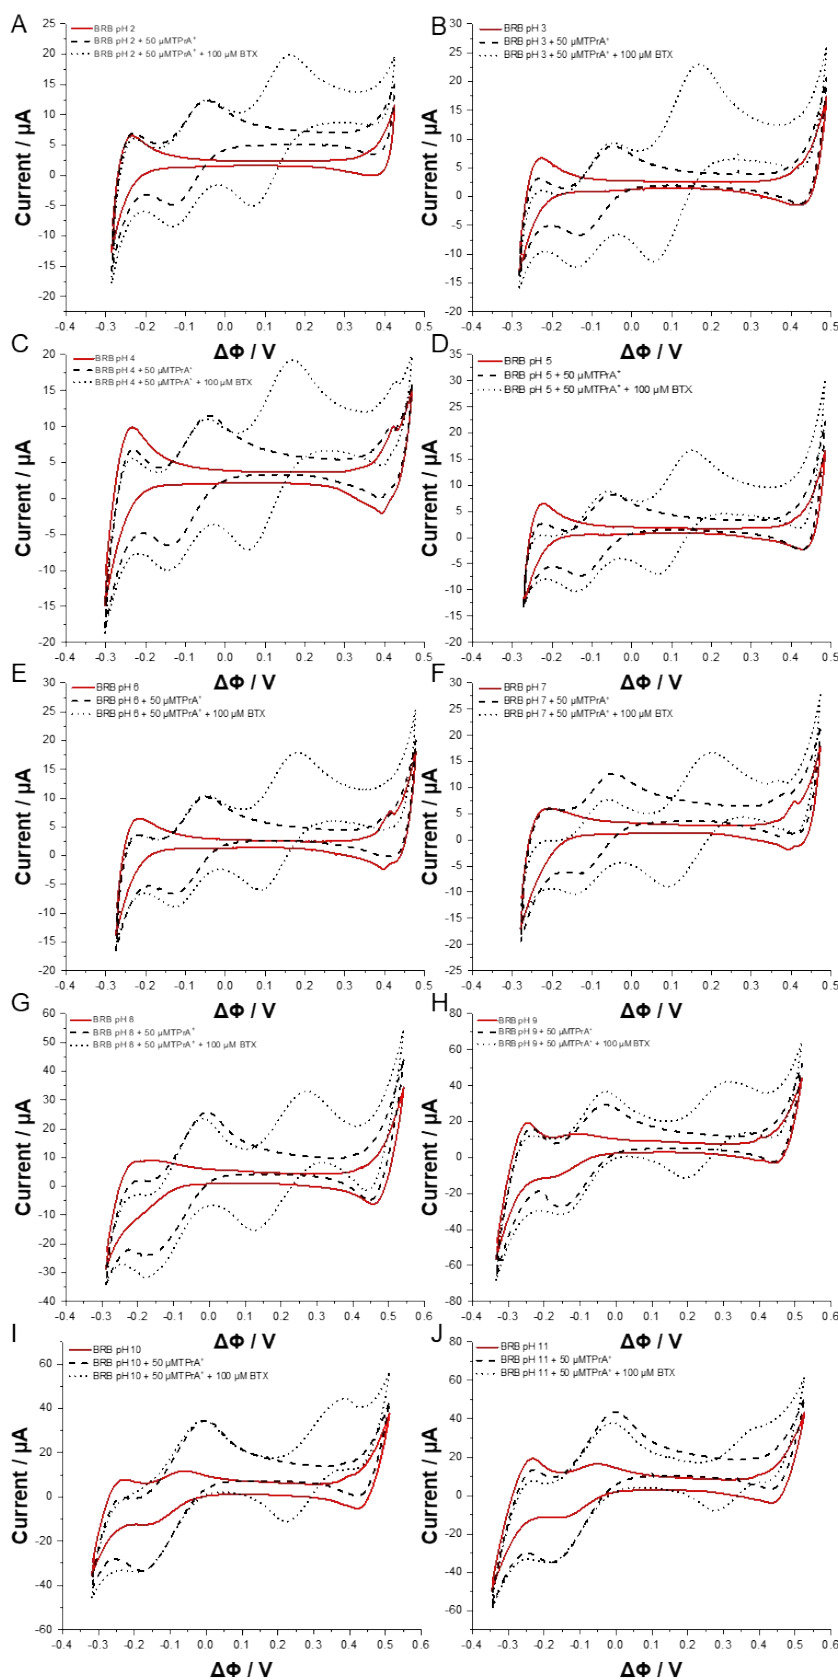

**Figure S2** Cyclic voltammograms (CVs) recorded at different pH of the aqueous phase for betaxolol. Conditions: BRB solutions in pH range 2-11; the scan rate was  $20 \text{ mV} \cdot \text{s}^{-1}$ ,  $[\text{BTX}] = 100 \text{ } \mu\text{M}$  and  $[\text{TPA}^*] = 50 \text{ } \mu\text{M}$ .

## Electronic Supporting Information

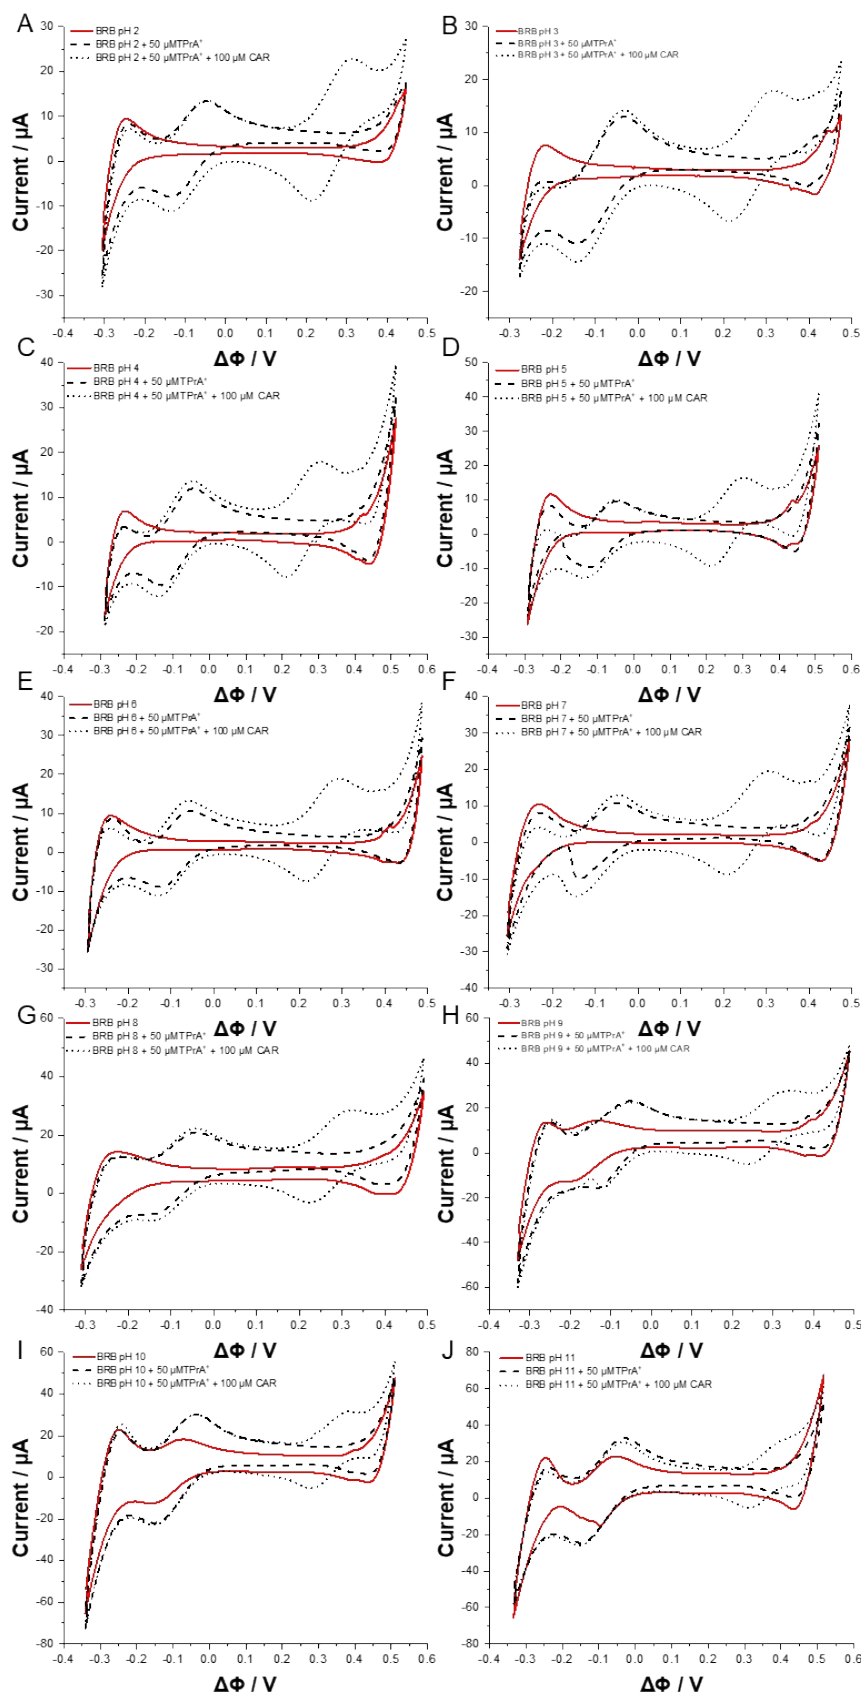

**Figure S3** Cyclic voltammograms (CVs) recorded at different pH of the aqueous phase for carteolol. Conditions: BRB solutions in pH range 2-11; the scan rate was  $20 \text{ mV} \cdot \text{s}^{-1}$ ,  $[\text{CAR}] = 100 \text{ } \mu\text{M}$  and  $[\text{TPrA}^+] = 50 \text{ } \mu\text{M}$ .

## Electronic Supporting Information

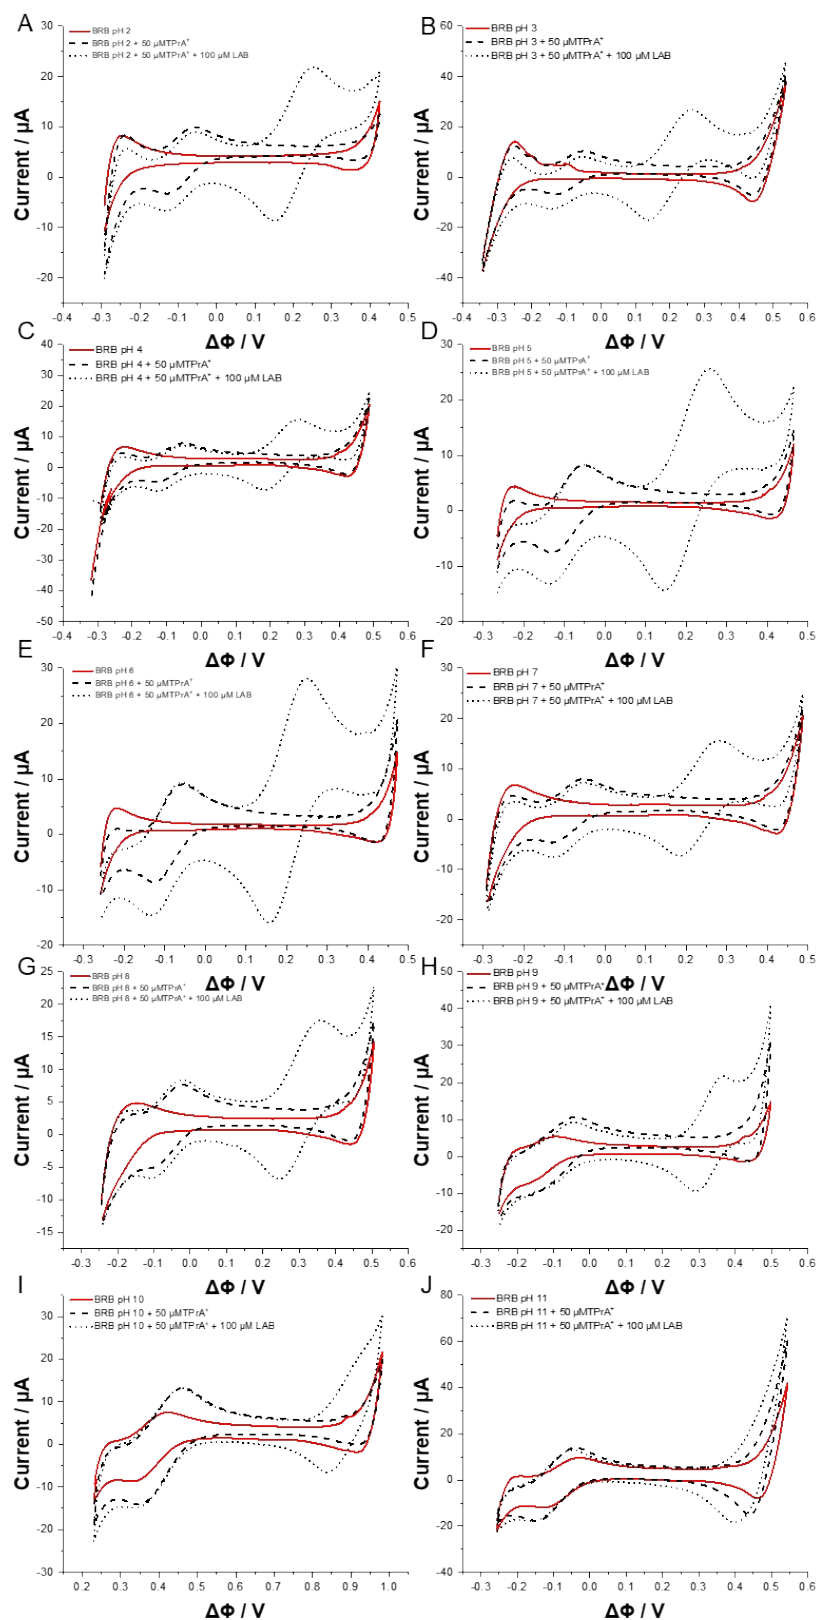

**Figure S4** Cyclic voltammograms (CVs) recorded at different pH of the aqueous phase for labetalol. Conditions: BRB solutions in pH range 2-11; the scan rate was  $20 \text{ mV} \cdot \text{s}^{-1}$ ,  $[\text{LAB}] = 100 \mu\text{M}$  and  $[\text{TPA}^+] = 50 \mu\text{M}$ .

## Electronic Supporting Information

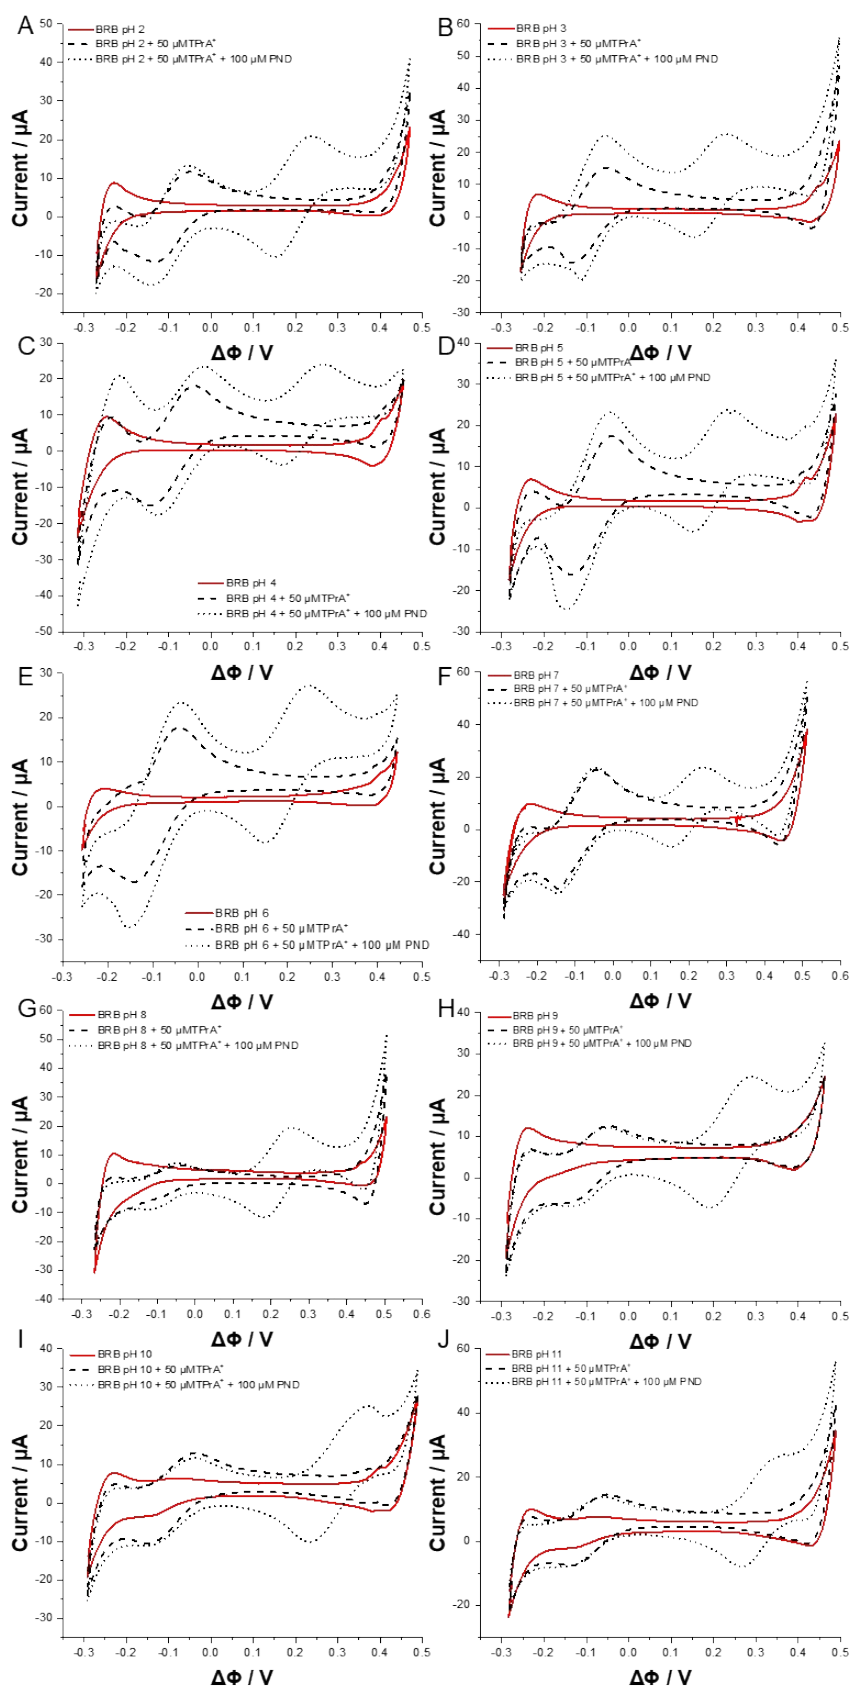

**Figure S5** Cyclic voltammograms (CVs) recorded at different pH of the aqueous phase for pindolol. Conditions: BRB solutions in pH range 2-11; the scan rate was  $20 \text{ mV} \cdot \text{s}^{-1}$ ,  $[\text{PND}] = 100 \text{ } \mu\text{M}$  and  $[\text{TPA}^+] = 50 \text{ } \mu\text{M}$ .

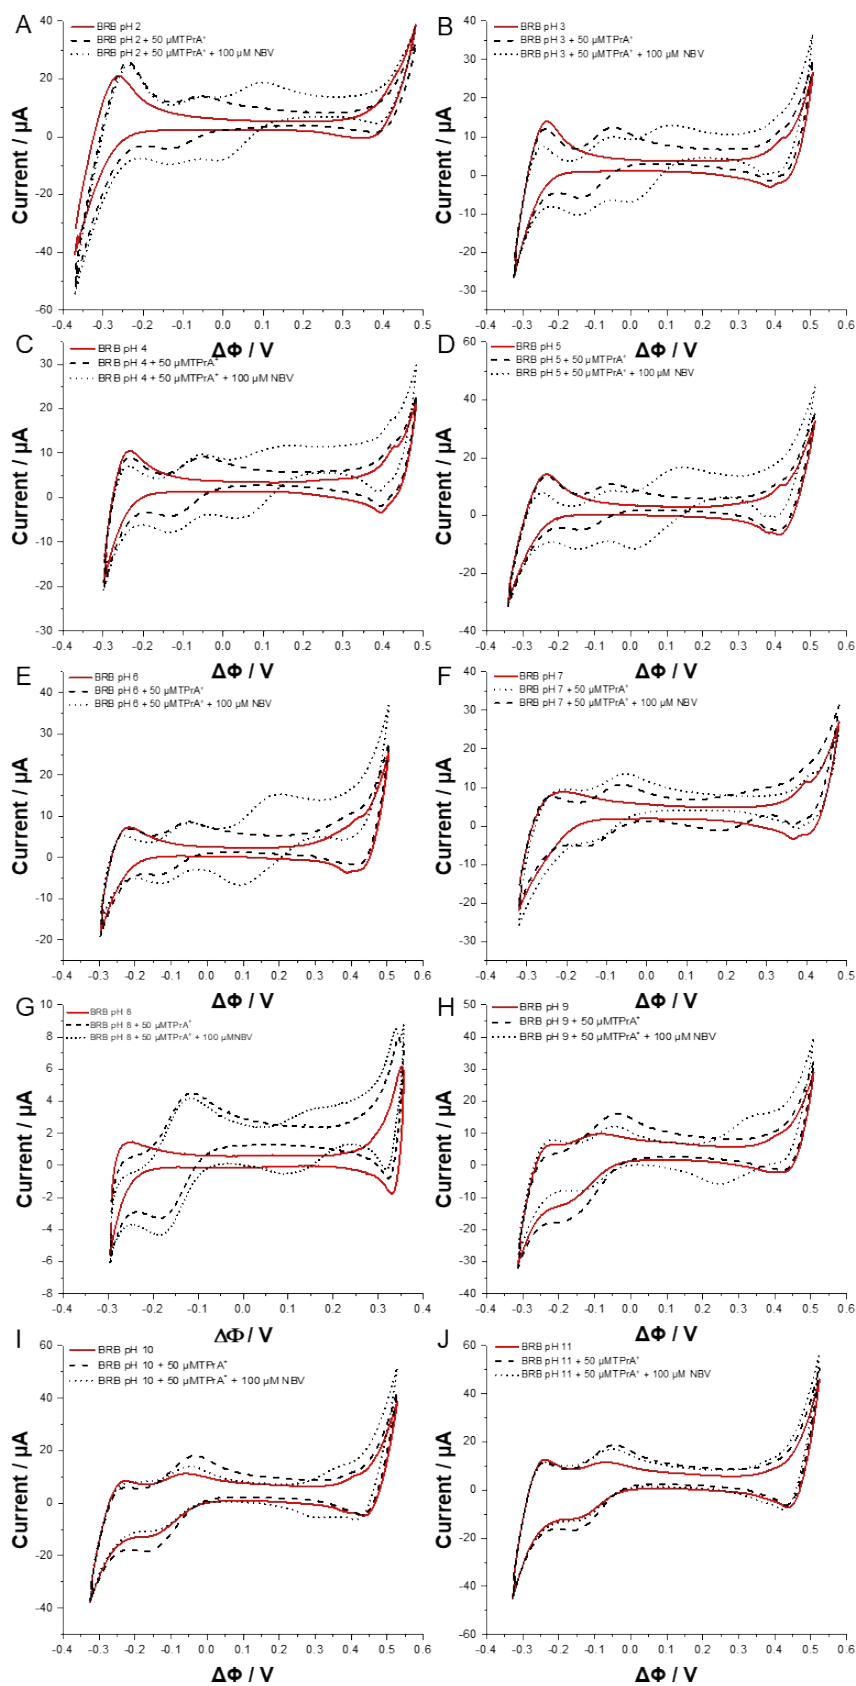

**Figure S5** Cyclic voltammograms (CVs) recorded at different pH of the aqueous phase for nebevivolol. Conditions: BRB solutions in pH range 2-11; the scan rate was  $20 \text{ mV} \cdot \text{s}^{-1}$ ,  $[\text{NBV}] = 100 \text{ } \mu\text{M}$  and  $[\text{TPrA}^+] = 50 \text{ } \mu\text{M}$ .

# Electronic Supporting Information

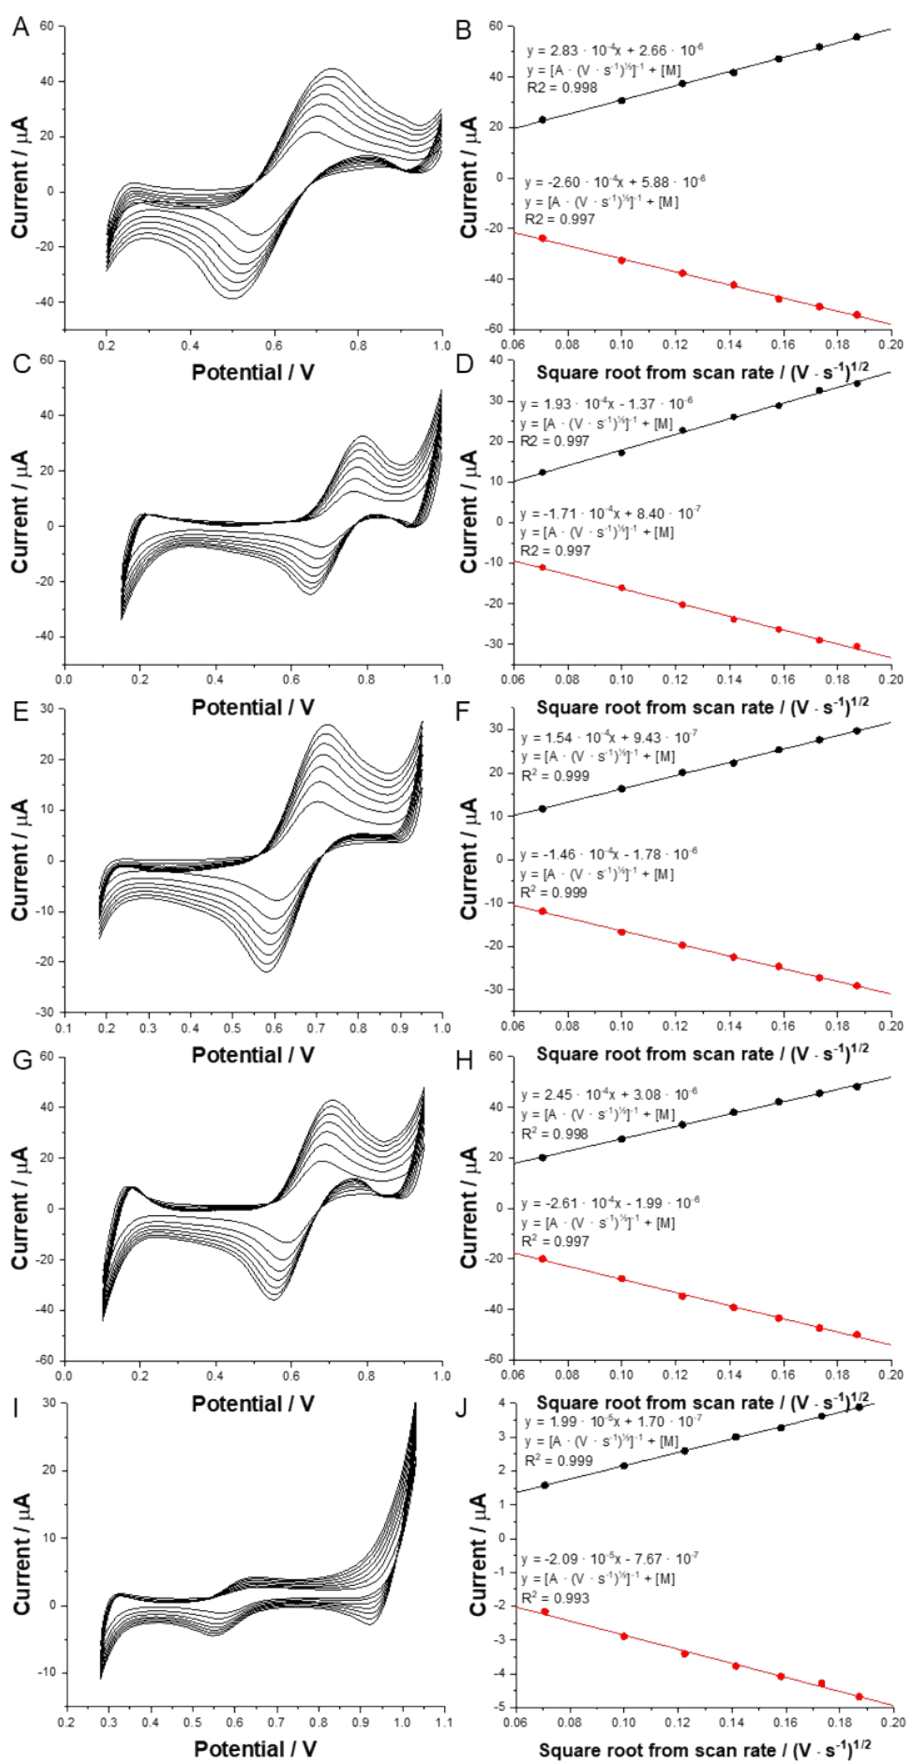

### *Electronic Supporting Information*

**Figure S7** Cyclic voltammograms recorded at different scan rates (5; 10; 15; 20; 25; 30 and 35 mVs<sup>-1</sup>) for selected  $\beta$ -blockers (A – betaxolol, C – carteolol, E – labetalol, G – pindolol, I – nebivolol). The dependency between positive and negative current is plotted in function of the square root of the scan rate with linear fit equations placed next to the corresponding voltammograms. The aqueous phase was 10 mM NaCl and [ $\beta$ -blockers] = 200  $\mu$ M.
